# Supplementary material for: Pepper Fruit Extracts Show Anti-Proliferative Activity against Tumor Cells Altering Their NADPH-Generating Dehydrogenase and Catalase Profiles
Source: MDPI journal article supplement (doi:10.3390/antiox12071461), 2023-07-20
Supplement: s1 [file s1]

**Supplementary Table S1.** Tyrosine (Y) nitrated polypeptides from Hep-G2 and MIA PaCa-2 tumor cell lines after the incubation with pepper fruit crude extracts from the variety Alegría riojana. The number of pixels, determined by using the program ImageJ, is given in those polypeptides which were differentially expressed after the treatment of cells with the pepper fruit crude extracts.

| Cell line  | Tyrosine (Y) nitrated polypeptides | Size (kDa) | No. Pixels (control cells) | No. Pixels (treated cells) |
|------------|------------------------------------|------------|----------------------------|----------------------------|
| Hep-G2     | PHY 1                              | 47.6       | 23734                      | 15490                      |
|            | PHY 2                              | 45.7       |                            |                            |
|            | PHY 3                              | 36.7       |                            |                            |
|            | PHY 4                              | 33.5       |                            |                            |
|            | PHY 5                              | 25.0       |                            |                            |
| MIA PaCa-2 | PMY 1                              | 65.1       | 5407                       | 4594                       |
|            | PMY 2                              | 47.6       | 7256                       | 10351                      |
|            | PMY 3                              | 45.7       |                            |                            |
|            | PMY 4                              | 36.7       |                            |                            |
|            | PMY 5                              | 33.0       |                            |                            |
|            | PMY 6                              | 29.5       |                            |                            |
|            | PMY 7                              | 25.0       | 8333                       | 12005                      |
|            | PMY 8                              | 18.4       | 8333                       | 12005                      |
|            | PMY 9                              | 16.4       |                            |                            |

**Supplementary Table S2.** Tryptophan (W) nitrated polypeptides from Hep-G2 and MIA PaCa-2 tumor cell lines after the incubation with pepper fruit crude extracts from the variety Alegría riojana.

| Cell line  | Tryptophan (W) nitrated polypeptides | Size (kDa) |
|------------|--------------------------------------|------------|
| Hep-G2     | PHW 1                                | 65.3       |
|            | PHW 2                                | 55.6       |
|            | PHW 3                                | 45.5       |
|            | PHW 4                                | 40.7       |
|            | PHW 5                                | 37.0       |
|            | PHW 6                                | 35.1       |
|            | PHW 7                                | 25.0       |
|            | PHW 8                                | 14.2       |
| MIA PaCa-2 | PMW 1                                | 71.3       |
|            | PMW 2                                | 48.0       |
|            | PMW 3                                | 43.9       |
|            | PMW 4                                | 38.8       |
|            | PMW 5                                | 34.1       |
|            | PMW 6                                | 29.9       |
|            | PMW 7                                | 26.5       |
|            | PMW 8                                | 17.8       |
|            | PMW 9                                | 15.6       |

**Supplementary Table S3.** Cysteine (C) nitrosated polypeptides from Hep-G2 and MIA PaCa-2 tumor cell lines after the incubation with pepper fruit crude extracts from the variety Alegría riojana.

| Cell line  | Cysteine (C) nitrosated polypeptides | Size (kDa) |
|------------|--------------------------------------|------------|
| Hep-G2     | PHC 1                                | 88.4       |
|            | PHC 2                                | 68.4       |
|            | PHC 3                                | 62.4       |
|            | PHC 4                                | 31.3       |
|            | PHC 5                                | 29.0       |
|            | PHC 6                                | 25.0       |
| MIA PaCa-2 | PMC 1                                | 50.0       |
|            | PMC 2                                | 37.6       |
|            | PMC 3                                | 29.0       |
|            | PMC 4                                | 27.8       |
|            | PMC 5                                | 22.3       |

**Supplementary Table S4.** Glutathionylated polypeptides from Hep-G2 and MIA PaCa-2 tumor cell lines after the incubation with pepper fruit crude extracts from the variety Alegría riojana. The number of pixels, determined by using the program ImageJ, is given in those polypeptides which were differentially expressed after the treatment of cells with the pepper fruit crude extracts.

| Cell line  | Glutathionylated polypeptides | Size (kDa) | No. Pixels (control cells) | No. Pixels (treated cells) |
|------------|-------------------------------|------------|----------------------------|----------------------------|
| Hep-G2     | PHG 1                         | 62.6       |                            |                            |
|            | PHG 2                         | 47.0       |                            |                            |
|            | PHG 3                         | 42.7       |                            |                            |
|            | PHG 4                         | 38.2       |                            |                            |
|            | PHG 5                         | 35.2       |                            |                            |
|            | PHG 6                         | 33         |                            |                            |
|            | PHG 7                         | 26.2       |                            |                            |
|            | PHG 8                         | 24.0       |                            |                            |
|            | PHG 9                         | 15.6       |                            |                            |
| MIA PaCa-2 | PMG 1                         | 61.0       |                            |                            |
|            | PMG 2                         | 37.0       |                            |                            |
|            | PMG 3                         | 33.1       | 3565                       | 2294                       |
|            | PMG 4                         | 22.6       |                            |                            |
|            | PMG 5                         | 15.0       |                            |                            |
|            | PMG 6                         | 11.6       | 2487                       | 1107                       |
